# Supplementary material
Source: publisher site journal article supplement (https://www.dovepress.com/get_supplementary_file.php?f=253700.docx)
Supplement: Supplementary file 1 [file get_supplementary_file.php]

**Supplementary Table S1** Demographic and characteristics of the PAC-CVD patients

| Patient number | 537 |
| --- | --- |
| Age (years) |  |
| <65 | 252 (46.9) |
| 65-74 | 160 (29.8) |
| 75 | 125 (23.3) |
| Male | 358 (66.7) |
| Initial NIHSS at acute care hospital | 6 (4-9) |
| Discharge NIHSS at acute care hospital | 5 (3-7) |
| LOS at acute care hospital (days) | 12 (10-16.5) |
| LOS at rehabilitation ward (days) | 41 (28-71) |
| Ischemic stroke | 461 (85.8) |
| Side of stroke | |
| Right | 238 (44.3) |
| Left | 271 (50.5) |
| Bilateral | 28 (5.2) |
| Stroke location | |
| Cortical and subcortical | 119 (22.2) |
| Subcortical | 271 (50.5) |
| Infratentorial | 145 (27) |
| Undetermined | 2 (0.3) |
| Large vessel stenosis | 59 (11) |
| Large vessel occlusion | 37 (6.9) |
| Hyperacute stage treatment | |
| IVT | 12 (2.2) |
| EVT | 7 (1.3) |
| IVT + EVT | 5 (0.9) |
| Comorbidities | |
| Cardiovascular diseases | 450 (83.8) |
| Hypertension | 413 (76.9) |
| Old cerebrovascular disease | 117 (21.8) |
| Atrial fibrillation | 57 (10.6) |
| Other cardiovascular diseases | 52 (9.7) |
| Dyslipidemia | 246 (45.8) |
| Diabetes mellitus | 218 (40.6) |
| Gout | 36 (6.7) |
| Chronic kidney disease | 25 (4.6) |
| Restrictive lung disease | 12 (2.2) |
| Dementia | 12 (2.2) |
| Psychiatric or mood disorder | 12 (2.2) |
| Complications at acute care ward | |
| Urinary tract infection | 41 (7.6) |
| Pneumonia | 40 (7.4) |
| Gastrointestinal bleeding | 26 (4.8) |
| Cellulitis | 10 (1.9) |
| Rehabilitation duration | |
| No more than 3 weeks | 85 (15.8) |
| Between 3 and 6 weeks | 143 (26.6) |
| Between 6 and 12 weeks | 309 (57.5) |
| Discharge destination after the PAC-CVD program | |
| Home | 476 (88.6) |
| Readmission to acute ward | 26 (4.8) |
| Against advice discharge | 22 (4.1) |
| Other rehabilitation institution | 14 (2.6) |

Values are expressed as median (interquartile range) or counts (percentage). EVT, endovascular thrombectomy;

IVT, intravenous thrombolysis; LOS, length of stay. NIHSS, National Institute of Health Stroke Scale; PAC-CVD, Post-Acute Care-Cerebrovascular Disease.

**Supplementary Table S2** Comparison of patients who had completed 8-12 weeks of PAC (continued)

|  | IS | ICH | *p* value |
| --- | --- | --- | --- |
| Patient number | 258 | 46 |  |
| Comorbidities | | | |
| Pulmonary disease | 5 (1.9) | 1 (2.2) | 0.63 |
| Liver cirrhosis | 2 (0.8) | 0 (0) | 0.72 |
| Hepatitis | 6 (2.3) | 2 (4.3) | 0.35 |
| Parkinsonism | 6 (2.3) | 1 (2.2) | 0.71 |
| Malignancy | 12 (4.7) | 1 (2.2) | 0.39 |
| Gout | 16 (6.2) | 1 (2.2) | 0.24 |
| Dementia | 3 (1.2) | 0 (0) | 0.61 |
| Psychiatric disorder | 7 (2.7) | 2 (4.3) | 0.41 |
| Complications at acute ward | | | |
| Pneumonia | 14 (5.4) | 3 (6.5) | 0.49 |
| Urinary tract infection | 20 (7.8) | 4 (8.7) | 0.51 |
| Stroke-in-evolution | 7 (2.7) | 0 (0) | 0.31 |
| Gastrointestinal bleeding | 6 (2.3) | 0 (0) | 0.37 |
| Cellulitis | 5 (1.9) | 1 (2.2) | 0.63 |
| Functional assessments in PAC hospital | | | |
| Functional Oral Intake Scale |  |  |  |
| FOIS-I | 6 (5-7) | 6 (6-7) | 0.23 |
| FOIS-F | 7 (7-7) | 7 (6.75-7) | 0.8 |
| ΔFOIS | 0 (0-1) | 0 (0-1) | 0.3 |
| Mini-Nutritional Assessment |  |  |  |
| MNA-I | 18 (12-22) | 18 (11-21) | 0.19 |
| MNA-F | 21 (14-24) | 20 (13-23) | 0.31 |
| ΔMNA | 1 (0-3) | 2 (1-4) | 0.71 |
| Gait-speed |  |  |  |
| Gait-speed-I | 0 (0-10) | 0 (0-7) | 0.10 |
| Gait-speed-F | 7 (5-12) | 7 (4-15) | 0.99 |
| ΔGait-speed | 0 (-3-11) | 5 (-1-13) | 0.19 |
| 6-minute walk test |  |  |  |
| 6MWT-I | 0 (0-135) | 0 (0-30) | 0.10 |
| 6MWT-F | 255 (99-409) | 225 (86-427) | 0.63 |
| Δ6MWT | 82 (36-227) | 58 (0-152) | 0.62 |
| Instrumental activities of daily living |  |  |  |
| IADL-I | 1 (1-2) | 1.5 (1-2) | 0.76 |
| IADL-F | 3 (1-4) | 3 (1.75-4) | 0.57 |
| ΔIADL | 1 (0-2) | 1 (0-2) | 0.35 |
| Motor Activity Log a |  |  |  |
| MAL-amount-I | 0.6 (0.1-2.1) | 0.4 (0-1.9) | 0.62 |
| MAL-amount-F | 2.9 (1.3-3.8) | 1.7 (0.3-3.2) | 0.75 |
| ΔMAL-amount | 1.2 (0.5-2.1) | 0.9 (0.3-1.5) | 0.15 |
| MAL-quality-I | 0.6 (0.1-1.9) | 0.4 (0-1.6) | 0.67 |
| MAL-quality-F | 2.7 (1.1-3.7) | 1.4 (0.3-3.2) | 0.70 |
| ΔMAL-quality | 1.2 (0.5-2.0) | 0.9 (0.6-1.6) | 0.21 |
| Concise Chinese aphasia test b |  |  |  |
| CCAT-I | 10.9 (10.1-11.6) | 11.4 (9.8-11.8) | 0.18 |
| CCAT-F | 11.6 (11-11.8) | 11.7 (11.2-11.9) | 0.16 |
| ΔCCAT | 0.4 (0.1-0.9) | 0.2 (0-0.9) | 0.06 |

Values were expressed as median (interquartile range) or counts (percentage). 6-MWT, 6-minute walk test; CCAT, Concise Chinese aphasia test; FOIS, Functional Oral Intake Scale; IADL, Instrumental activities of daily living; ICH, intracerebral hemorrhage; IS, ischemic stroke; MAL-amount, Motor Activity Log amount of use; MAL-quality, Motor Activity Log quality of use; MNA, Mini-Nutritional Assessment. The “-I” and “-F” represent the initial and final functional assessments, respectively.

a 161 IS and 23 IS patients were evaluated.

b 204 IS and 32 ICH patients were evaluated.

| **Table S3** Publications comparing the functional outcomes of IS and ICH patients | | | | | | | |
| --- | --- | --- | --- | --- | --- | --- | --- |
| Author | Year | Population | Conclusion | Study design | Patient number (IS, ICH) | Rehabilitation | Functional outcome measure |
| Chu et al. (this study) | 2020 | Asian (Taiwan) | Subcortical ICH patients had greater BI, QoL, sensation, and balance improvements, and had greater late phase recovery than their IS counterparts after the PAC-CVD program | Retrospective | 489 (414,75) | Yes | Many |
| Hsu et al. 1 | 2018 | Asian (Taiwan) | ICH patients had greater improvements in BI, QoL, swallowing, gait speed, sensation, and language after the PAC-CVD program | Retrospective | 45 (33,12) | Yes | Many |
| Paulocci et al. 2 | 2015 | Westerner (Italy) | ICH patients had higher effectiveness and efficiency on the CNS, BI, and RMI scores | Case-match | 270 (135,135) | Yes | CNS, BI, RMI |
| Perna et al. 3 | 2015 | Westerner (United states) | No significant difference between ICH and IS patients | Retrospective | 284 (172,112) | Yes | MPAI-4 |
| Kelly et al. 4 | 2003 | Westerner (United states) | ICH patients had greater functional impairment when admitted to rehabilitation ward but made greater gains | Retrospective | 1064 (871,193) | Yes | FIM |
| Chae et al. 5 | 1996 | Westerner (United states) | ICH patients had faster functional improvement, especially in motor function | Case-match | 50 (25,25) | Yes | FIM |
| Bhalla et al. 6 | 2013 | Westerner (United Kingdom) | ICH patients had greater functional improvement within the first 3 months after stroke, but had poorer outcome for up to 5 years | Retrospective | 3730 (3177,553) | Not mentioned | BI |
| Chiu et al. 7 | 2010 | Westerner (United states) | Among conscious stroke patients, ICH was associated with a mean 0.25-point increase in 3-month mRS score | Retrospective | 1604 (1367, 237) | Not mentioned | mRS |
| Jørgensen et al. 8 | 1995 | Westerner (Denmark) | Increased stroke severity in ICH patients was responsible for their poorer prognosis | Prospective | 1000 (912, 88) | Not mentioned | BI |
| Franke et al. 9 | 1992 | Westerner (Netherlands) | Similar functional outcome after the acute stage | Case-match | 240 (120,120) | Not mentioned | mRS |
| BI, Barthel Index; CNS, Canadian Neurological Scale; FIM, Functional Independence Measure; ICH, intracerebral hemorrhage; IS, ischemic stroke; MPAI-4, Mayo Portland Adaptability; mRS, modified Rankin Scale; Inventory-4; PAC-CVD, Post-Acute Care Cerebrovascular Disease; QoL, quality of life; RMI, Rivermead Mobility Index. | | | | | | | |

**Reference**

1. Hsu Y, Chen G, Chen P, Lin S. Postacute care model of stroke in one hospital. Tzu Chi Med. J. 31:260–5.

2. Paolucci S, Antonucci G, Grasso MG, Bragoni M, Coiro P, De Angelis D, et al. Functional Outcome of Ischemic and Hemorrhagic Stroke Patients after Inpatient Rehabilitation: A Matched Comparison. Stroke. 2003.

3. Perna R, Temple J. Rehabilitation Outcomes: Ischemic versus Hemorrhagic Strokes. Behav. Neurol. 2015.

4. Kelly PJ, Furie KL, Shafqat S, Rallis N, Chang Y, Stein J. Functional recovery following rehabilitation after hemorrhagic and ischemic stroke. Arch. Phys. Med. Rehabil. 2003.

5. Chae J, Zorowitz RD, Johnston M V. FUNCTIONAL OUTCOME OF HEMORRHAGIC AND NONHEMORRHAGIC STROKE PATIENTS AFTER IN-PATIENT REHABILITATION. Am. J. Phys. Med. Rehabil. 1996.

6. Bhalla A, Wang Y, Rudd A, Wolfe CDA. Differences in outcome and predictors between ischemic and intracerebral hemorrhage: The South London Stroke Register. Stroke. 2013;44:2174–81.

7. Chiu D, Peterson L, Elkind MSV, Rosand J, Gerber LM, Silverstein MD. Comparison of Outcomes after Intracerebral Hemorrhage and Ischemic Stroke. J. Stroke Cerebrovasc. Dis. [Internet]. 2010;19:225–9. Available from: http://dx.doi.org/10.1016/j.jstrokecerebrovasdis.2009.06.002

8. HS. J, H. N, HO. R, TS. O. Intracerebral hemorrhage versus infarction: stroke severity, risk factors, and prognosis. Ann. Neurol. [Internet]. 1995;38:45–50.

9. Franke CL, Van Swielen JC, Algra A, Van Gijn J. Prognostic factors in patients with intracerebral haematoma. J. Neurol. Neurosurg. Psychiatry. 1992.
